# Supplementary material
Source: PubMed Central journal article supplement (PMC4790485)
Supplement: ortf003272.ww1_default.pdf [file ortf003272.ww1_default.pdf]

## **WEB-EXTRA MATERIALS**

**Appendix Table A. Baseline characteristics of the study sample.**

**Appendix Table B. Baseline characteristics of the sample according to tenths of muscular strength.**

**Appendix Table C. Mortality rates according to exposure categories for all-cause death, cardiovascular disease death and suicide death.**

**Appendix Table D. Healthy muscular fitness zones for handgrip strength (kg) in European adolescents.**

**Appendix Table E. Healthy muscular fitness zones for standing long jump (cm) in European adolescents.**

**Appendix Figure A. Flow diagram.**

**Appendix Figure B. Distribution of the strength variables as histograms.**

**Appendix Figure C. Hazard ratios and 95% confidence intervals for the relation of muscular strength, body mass index and diastolic blood pressure with premature death due to non-intentional accidents.**

Models were adjusted for birth cohort, conscription age, conscription office (N=1,122,301).

**Appendix Figure D. Hazard ratios and 95% confidence intervals for the relation of muscular strength, body mass index and blood pressure with premature death due to any other cause.**

Models were adjusted for birth cohort, conscription age, conscription office (N=1,123,036).

**Appendix Figure E. Hazard ratios and 95% confidence intervals for the relation of muscular strength, body mass index and diastolic blood pressure, mutually adjusted, with premature death due to cancer, non-intentional accidents and other-causes.**

Models were adjusted for birth cohort, conscription age, conscription office.

**Appendix Figure F. Odds ratios and 95% confidence intervals of psychiatric diagnosis at conscription (baseline) and after conscription (follow-up), according to muscular strength levels.**

Models were adjusted for birth cohort, conscription age, conscription office (N= 1,132,939).

Participants with psychiatric diagnosis before conscription were excluded (N=9,609)

**Appendix Table A. Baseline characteristics of the study sample.**

| No. participants                       | 1,142,599        |              |
|----------------------------------------|------------------|--------------|
|                                        | <b>Mean (SD)</b> | <b>Range</b> |
| Age - years                            | 18.3 (0.5)       | 16.0-19.9    |
| Knee extension strength - N            | 568.1 (117.4)    | 50-999*      |
| Handgrip strength - N                  | 615.9 (97.8)     | 100-999*     |
| Elbow flexion strength - N             | 387.0 (84.3)     | 100-999*     |
| Body mass index - kg/m <sup>2</sup>    | 21.6 (2.8)       | 15-55        |
| Diastolic blood pressure - mmHg        | 67.5 (10.0)      | 40-100       |
| Systolic blood pressure - mmHg         | 128.5 (10.9)     | 100-180      |
|                                        | <b>No.</b>       | <b>%</b>     |
| <b>Mother's socioeconomic position</b> |                  |              |
| Others                                 | 710,399          | 62.3         |
| Unskilled worker                       | 187,990          | 16.5         |
| Skilled worker                         | 38,124           | 3.3          |
| Nonmanual (low)                        | 98,046           | 8.6          |
| Nonmanual (high/intermediate)          | 105,227          | 9.2          |
| Total†                                 | 1,139,786        | 100.0        |
| <b>Father's socioeconomic position</b> |                  |              |
| Others                                 | 142,269          | 12.6         |
| Unskilled worker                       | 306,478          | 27.2         |
| Skilled worker                         | 271,713          | 24.1         |
| Nonmanual (low)                        | 112,922          | 10.0         |
| Nonmanual (high/intermediate)          | 292,015          | 25.9         |
| Total†                                 | 1,125,397        | 100.0        |
| <b>Mother's education</b>              |                  |              |
| <9 years of primary school             | 532,274          | 48.9         |
| 9–10 years of primary school           | 168,541          | 15.5         |
| Secondary school                       | 300,953          | 27.7         |
| Higher education                       | 85,962           | 7.9          |
| Total†                                 | 1,087,730        | 100.0        |
| <b>Father's education</b>              |                  |              |
| <9 years of primary school             | 499,271          | 47.4         |
| 9–10 years of primary school           | 83,084           | 7.9          |
| Secondary school                       | 365,520          | 34.7         |
| Higher education                       | 105,718          | 10.0         |
| Total†                                 | 1,053,593        | 100.0        |
| <b>Own education</b>                   |                  |              |
| <9 years of primary school             | 13,306           | 1.2          |
| 9–10 years of primary school           | 145,303          | 12.9         |
| Secondary school                       | 596,150          | 52.7         |
| Higher education                       | 375,576          | 33.2         |
| Total†                                 | 1,130,335        | 100.0        |

\* The maximum value registered by the dynamometers was 999 N and 0.003-0.14% of the population achieved this value. This minor ceiling effect cannot influence our results because of the small proportion of participants with the maximum value and because the main analyses were done using categorized variables (tenths) as exposures and the participants scoring the maximum value would anyhow belong to the top tenth. †These variables were available only in a subset to the study sample as indicated with the sample size.

**Appendix Table B. Baseline characteristics of the sample according to tenths of muscular strength.**

| Tenths of Knee extension strength | Body mass index (kg/m <sup>2</sup> ) |       | Diastolic Blood Pressure (mmHg) |        | Systolic Blood Pressure (mmHg) |        |
|-----------------------------------|--------------------------------------|-------|---------------------------------|--------|--------------------------------|--------|
|                                   | Mean                                 | SD    | Mean                            | SD     | Mean                           | SD     |
| 1                                 | 19.9                                 | 2.4   | 67.6                            | 9.8    | 126.8                          | 10.9   |
| 2                                 | 20.4                                 | 2.3   | 67.7                            | 9.8    | 127.4                          | 10.8   |
| 3                                 | 20.9                                 | 2.4   | 67.6                            | 9.8    | 127.8                          | 10.8   |
| 4                                 | 21.1                                 | 2.4   | 67.5                            | 9.9    | 128.1                          | 10.8   |
| 5                                 | 21.4                                 | 2.4   | 67.4                            | 10.0   | 128.3                          | 10.8   |
| 6                                 | 21.7                                 | 2.5   | 67.6                            | 10.0   | 128.6                          | 10.8   |
| 7                                 | 22.0                                 | 2.6   | 67.3                            | 10.0   | 128.8                          | 10.8   |
| 8                                 | 22.4                                 | 2.7   | 67.3                            | 10.0   | 129.2                          | 10.8   |
| 9                                 | 22.9                                 | 2.8   | 67.1                            | 10.1   | 129.5                          | 10.7   |
| 10                                | 23.8                                 | 3.2   | 67.2                            | 10.1   | 130.4                          | 10.8   |
| Tenths of Handgrip strength       | Mean                                 | SD    | Mean                            | SD     | Mean                           | SD     |
| 1                                 | 20.34                                | 2.735 | 67.43                           | 9.914  | 126.94                         | 10.935 |
| 2                                 | 20.79                                | 2.616 | 67.08                           | 9.909  | 127.50                         | 10.823 |
| 3                                 | 21.06                                | 2.619 | 67.23                           | 9.909  | 127.79                         | 10.818 |
| 4                                 | 21.30                                | 2.634 | 67.14                           | 9.939  | 128.08                         | 10.807 |
| 5                                 | 21.50                                | 2.644 | 67.47                           | 9.956  | 128.31                         | 10.785 |
| 6                                 | 21.74                                | 2.662 | 67.22                           | 9.972  | 128.70                         | 10.821 |
| 7                                 | 21.92                                | 2.684 | 67.54                           | 9.971  | 128.85                         | 10.781 |
| 8                                 | 22.16                                | 2.728 | 67.54                           | 9.973  | 129.16                         | 10.845 |
| 9                                 | 22.49                                | 2.815 | 67.73                           | 10.006 | 129.44                         | 10.767 |
| 10                                | 23.12                                | 2.993 | 68.04                           | 10.042 | 130.01                         | 10.788 |
| Tenths of Elbow flexion strength  | Mean                                 | SD    | Mean                            | SD     | Mean                           | SD     |
| 1                                 | 19.51                                | 2.192 | 67.62                           | 9.732  | 126.47                         | 10.869 |
| 2                                 | 20.31                                | 2.211 | 67.55                           | 9.768  | 127.33                         | 10.776 |
| 3                                 | 20.73                                | 2.254 | 67.40                           | 9.848  | 127.82                         | 10.817 |
| 4                                 | 21.08                                | 2.360 | 67.44                           | 9.910  | 128.06                         | 10.807 |
| 5                                 | 21.39                                | 2.406 | 67.44                           | 9.937  | 128.34                         | 10.818 |
| 6                                 | 21.69                                | 2.452 | 67.52                           | 9.951  | 128.65                         | 10.796 |
| 7                                 | 22.07                                | 2.585 | 67.30                           | 10.028 | 128.90                         | 10.738 |
| 8                                 | 22.52                                | 2.720 | 67.35                           | 10.048 | 129.26                         | 10.817 |
| 9                                 | 22.95                                | 2.838 | 67.37                           | 10.134 | 129.54                         | 10.818 |
| 10                                | 23.84                                | 3.220 | 67.52                           | 10.222 | 130.09                         | 10.807 |

**Appendix Table C. Mortality rates according to exposure categories for all-cause death, cardiovascular disease death and suicide death.**

| <b>All-cause premature mortality</b>              |         |           |              |                                               |
|---------------------------------------------------|---------|-----------|--------------|-----------------------------------------------|
| Muscular strength levels:<br>Knee extension       | N       | No. Cases | Person-years | Mortality rate<br>per 100,000<br>person-years |
| Very low strength<br>(1th tenth)                  | 113,517 | 3,737     | 3,055,311    | 122.3                                         |
| Low to middle strength<br>(2nd-4th tenths)        | 353,036 | 8,933     | 9,029,917    | 98.9                                          |
| Middle to very high strength<br>(≥5th tenth)      | 676,046 | 13,475    | 15,503,722   | 86.9                                          |
| Muscular strength levels:<br>Handgrip             | N       | No. Cases | Person-years | Mortality rate<br>per 100,000<br>person-years |
| Very low strength<br>(1th tenth)                  | 108,659 | 3,048     | 2,660,889    | 114.5                                         |
| Low to middle strength<br>(2nd-4th tenths)        | 332,240 | 7,723     | 8,006,341    | 96.5                                          |
| Middle to very high strength<br>(≥5th tenth)      | 701,700 | 15,374    | 16,921,720   | 90.9                                          |
| <b>Cardiovascular disease premature mortality</b> |         |           |              |                                               |
| Muscular strength levels:<br>Knee extension       | N       | No. Cases | Person-years | Mortality rate<br>per 100,000<br>person-years |
| Very low strength<br>(1th tenth)                  | 110,061 | 281       | 2,962,293    | 9.5                                           |
| Low to middle strength<br>(2nd-4th tenths)        | 344,747 | 644       | 8,817,901    | 7.3                                           |
| Middle to very high strength<br>(≥5th tenth)      | 663,426 | 855       | 15,214,309   | 5.6                                           |
| Muscular strength levels:<br>Handgrip             | N       | No. Cases | Person-years | Mortality rate<br>per 100,000<br>person-years |
| Very low strength<br>(1th tenth)                  | 105,827 | 216       | 2,591,538    | 8.3                                           |
| Low to middle strength<br>(2nd-4th tenths)        | 325,094 | 577       | 7,834,136    | 7.4                                           |
| Middle to very high strength<br>(≥5th tenth)      | 687,313 | 987       | 16,574,773   | 6.0                                           |
| <b>Suicide premature mortality</b>                |         |           |              |                                               |

| Muscular strength levels:<br>Knee extension  | N       | No. Cases | Person-years | Mortality rate<br>per 100,000<br>person-years |
|----------------------------------------------|---------|-----------|--------------|-----------------------------------------------|
| Very low strength<br>(1th tenth)             | 110,513 | 733       | 2,974,459    | 24.6                                          |
| Low to middle strength<br>(2nd-4th tenths)   | 345,895 | 1,792     | 8,847,265    | 20.3                                          |
| Middle to very high strength<br>(≥5th tenth) | 665,146 | 2,575     | 15,253,753   | 16.9                                          |
| Muscular strength levels:<br>Handgrip        |         |           |              |                                               |
| Very low strength<br>(1th tenth)             | 106,194 | 583       | 2,600,525    | 22.4                                          |
| Low to middle strength<br>(2nd-4th tenths)   | 326,064 | 1,547     | 7,857,511    | 19.7                                          |
| Middle to very high strength<br>(≥5th tenth) | 689,296 | 2,970     | 16,622,594   | 17.9                                          |

Note: Mortality rates for cancer were not calculated since no associations between measures of muscle strength and cancer death was observed.

**Appendix Table D. Healthy muscular fitness zones for handgrip strength (kg)\* in European adolescents.**

| Muscular strength level ** | Very low strength<br>(1 <sup>th</sup> tenth) | Low to middle<br>strength<br>(2 <sup>nd</sup> -4 <sup>th</sup> tenths) | Middle to very high<br>strength<br>(≥5 <sup>th</sup> tenth) |
|----------------------------|----------------------------------------------|------------------------------------------------------------------------|-------------------------------------------------------------|
| Associated risk **         | High risk zone                               | Healthier muscular<br>fitness zone                                     | Healthiest muscular<br>fitness zone                         |
| Boys                       |                                              |                                                                        |                                                             |
| 13 y                       | ≤19.2                                        | 19.3 – 24.7                                                            | >24.7                                                       |
| 14 y                       | ≤23.4                                        | 23.5 – 30.4                                                            | >30.4                                                       |
| 15 y                       | ≤28.1                                        | 28.2 – 35.7                                                            | >35.7                                                       |
| 16 y                       | ≤33.0                                        | 33.1 – 40.0                                                            | >40.0                                                       |
| 17 y                       | ≤37.4                                        | 37.5 – 43.5                                                            | >43.5                                                       |
| Girls                      |                                              |                                                                        |                                                             |
| 13 y                       | ≤18.1                                        | 18.2 – 22.5                                                            | >22.5                                                       |
| 14 y                       | ≤19.8                                        | 19.9 – 24.1                                                            | >24.1                                                       |
| 15 y                       | ≤20.7                                        | 20.8 – 25.1                                                            | >25.1                                                       |
| 16 y                       | ≤21.2                                        | 21.3 – 25.4                                                            | >25.4                                                       |
| 17 y                       | ≤22.2                                        | 22.3 – 26.4                                                            | >26.4                                                       |

\* Values expressed as average of right and left hands. To be converted to N multiply the value shown in the table (expressed in Kg) by 9.81.

\*\* These three muscular strength categories are based on the mortality risks observed in the present study (e.g. see Figure 6). However, the current study engaged only male adolescents 17-19 years of age from Sweden. In order to make the present reference data useful for more people and interesting from a public health perspective, the reference values shown in the table are taken from the HELENA study (2006-2008), which gathered male and female adolescents aged 13 to 17 years from nine European countries (including Sweden)<sup>45</sup>.

Important note: These reference values are tentative and further research in younger adolescents and female adolescents, as well as in different countries and ethnic groups, is needed before firm conclusions can be drawn.

**Appendix Table E. Healthy muscular fitness zones for standing long jump (cm) in European adolescents.**

| Muscular strength level * | Very low strength<br>(1 <sup>th</sup> tenth) | Low to middle<br>strength<br>(2 <sup>nd</sup> -4 <sup>th</sup> tenths) | Middle to very high<br>strength<br>(≥5 <sup>th</sup> tenth) |
|---------------------------|----------------------------------------------|------------------------------------------------------------------------|-------------------------------------------------------------|
| Associated risk *         | High risk zone                               | Healthier muscular<br>fitness zone                                     | Healthiest muscular<br>fitness zone                         |
| Boys                      |                                              |                                                                        |                                                             |
| 13 y                      | ≤123                                         | 124 – 152                                                              | >152                                                        |
| 14 y                      | ≤138                                         | 139 – 169                                                              | >169                                                        |
| 15 y                      | ≤152                                         | 153 – 183                                                              | >183                                                        |
| 16 y                      | ≤162                                         | 163 – 193                                                              | >193                                                        |
| 17 y                      | ≤169                                         | 170 – 202                                                              | >202                                                        |
| Girls                     |                                              |                                                                        |                                                             |
| 13 y                      | ≤107                                         | 108 – 134                                                              | >134                                                        |
| 14 y                      | ≤110                                         | 111 – 137                                                              | >137                                                        |
| 15 y                      | ≤112                                         | 113 – 138                                                              | >138                                                        |
| 16 y                      | ≤115                                         | 116 – 141                                                              | >141                                                        |
| 17 y                      | ≤119                                         | 120 – 144                                                              | >144                                                        |

\* These three muscular strength levels are based on the mortality risks observed in the present study (e.g. see Figure 6). However, the current study engaged only male adolescents 17-19 years of age from Sweden. In order to make the present reference data useful for more people and interesting from a public health perspective, the reference values shown in the table are taken from the HELENA study (2006-2008), which gathered male and female adolescents aged 13 to 17 years from nine European countries (including Sweden)<sup>45</sup>. Important note: These reference values are tentative and further research in younger adolescents and female adolescents, as well as in different countries and ethnic groups, is needed before firm conclusions can be drawn.



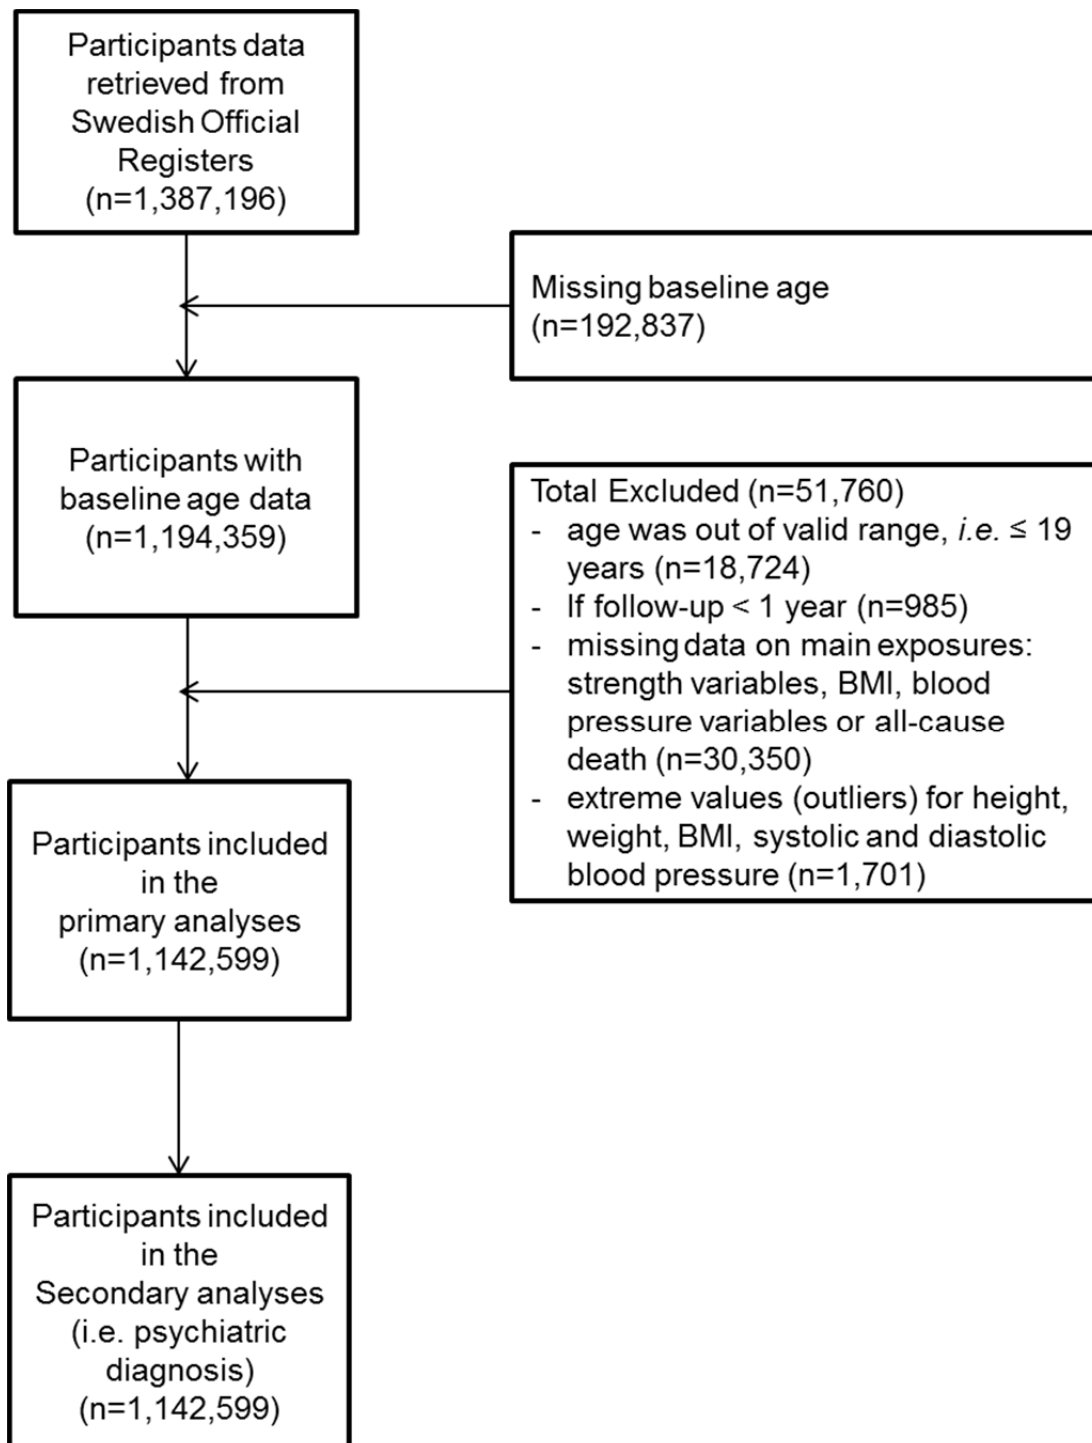

**Appendix Figure A.**

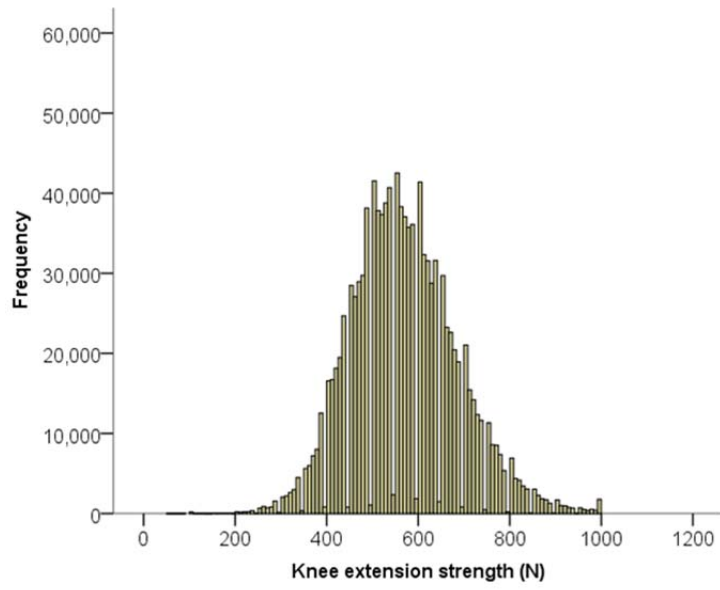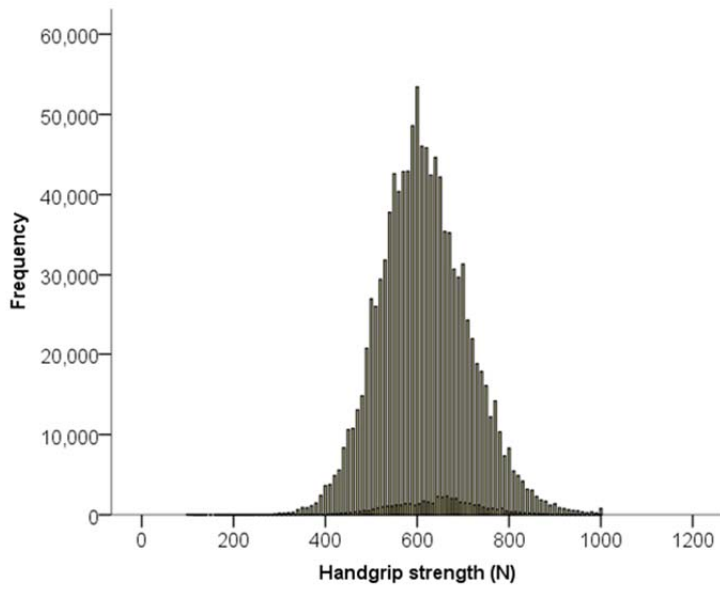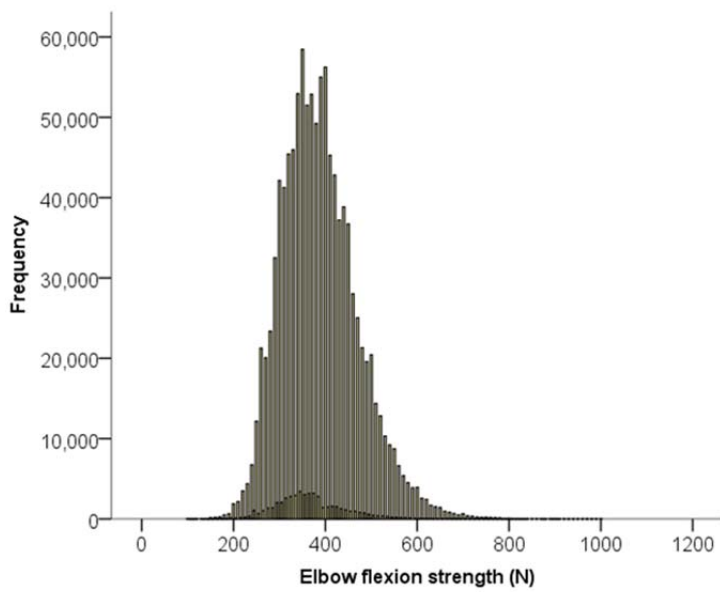

**Appendix Figure B.**

### Non-intentional Accident Mortality

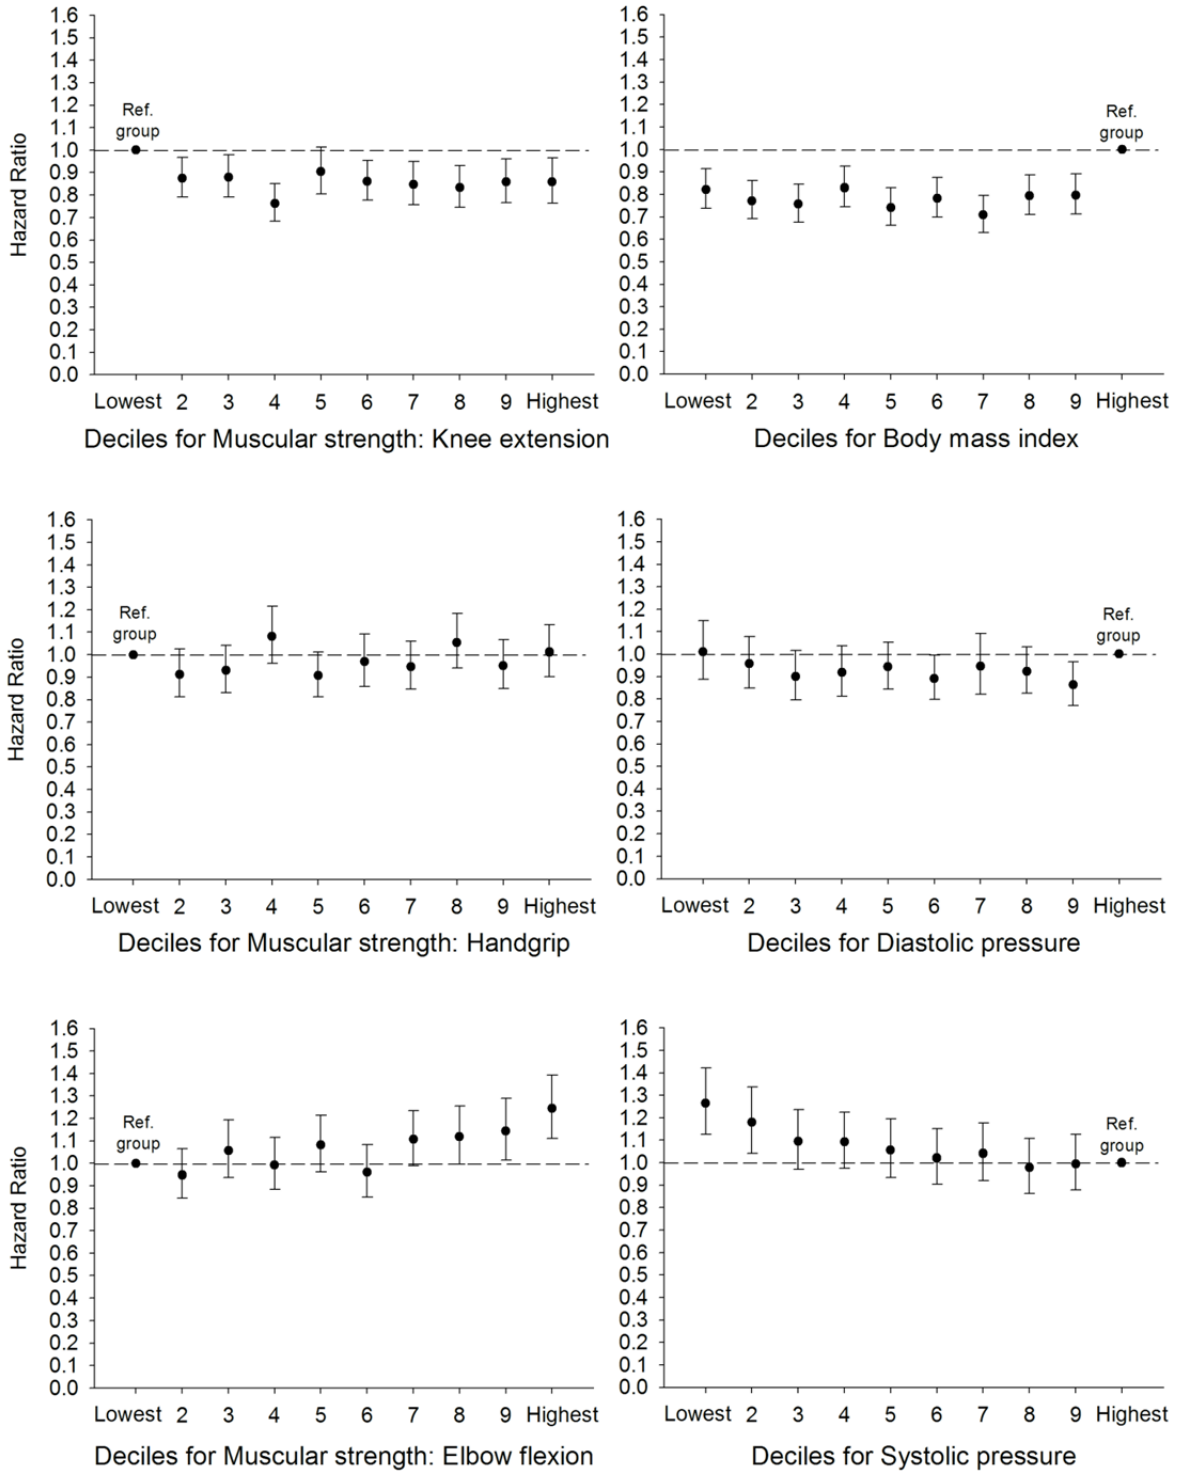

Appendix Figure C.

### Other-causes Mortality

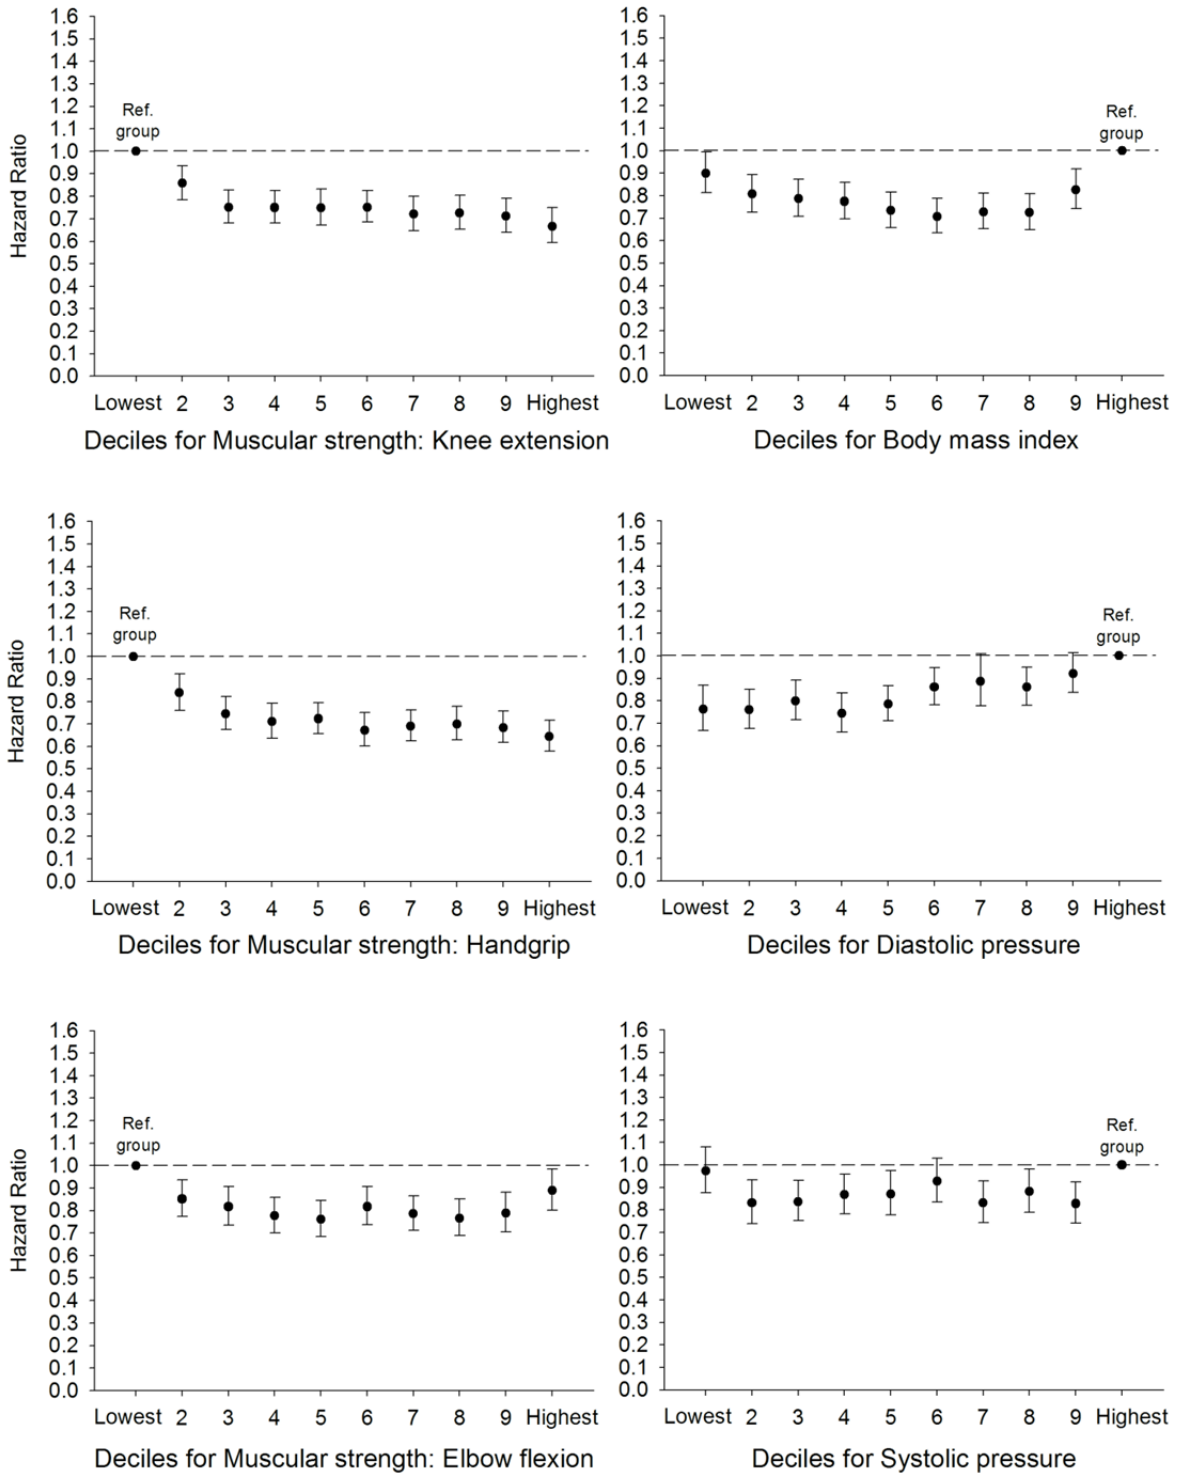

**Appendix Figure D.**

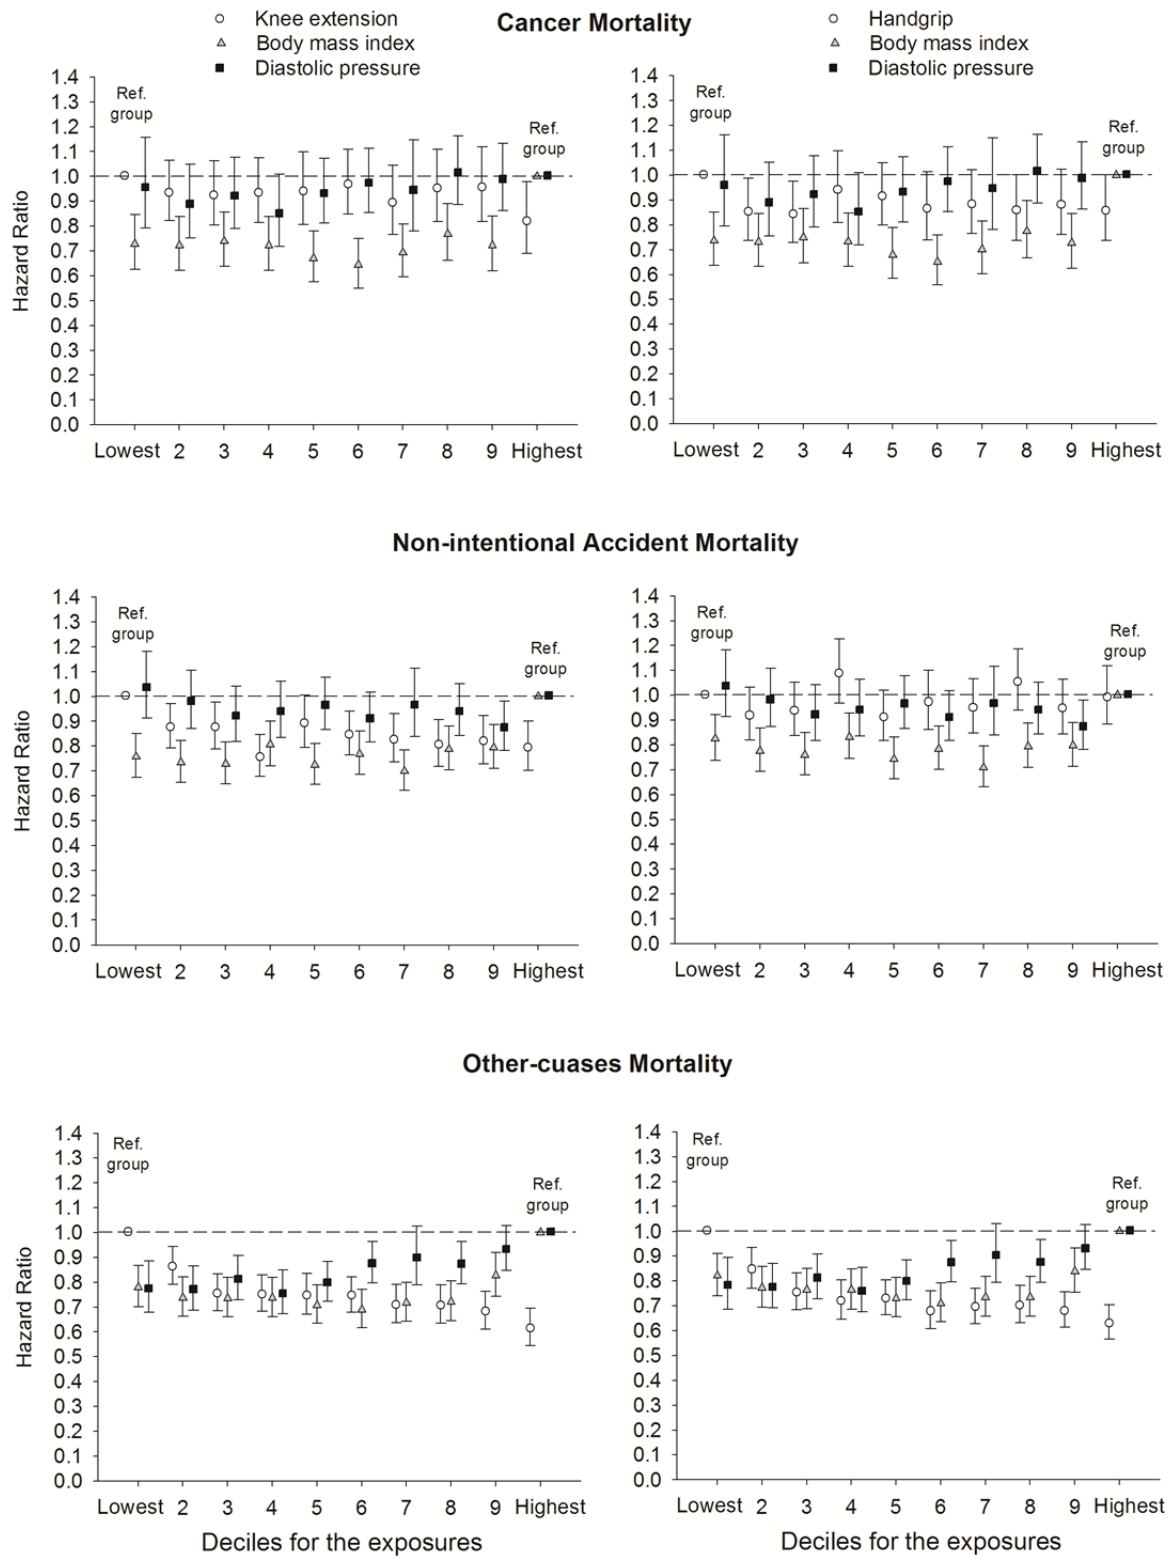

**Appendix Figure E.**

**Psychiatric diagnosis at baseline (cross-sectional analysis)**

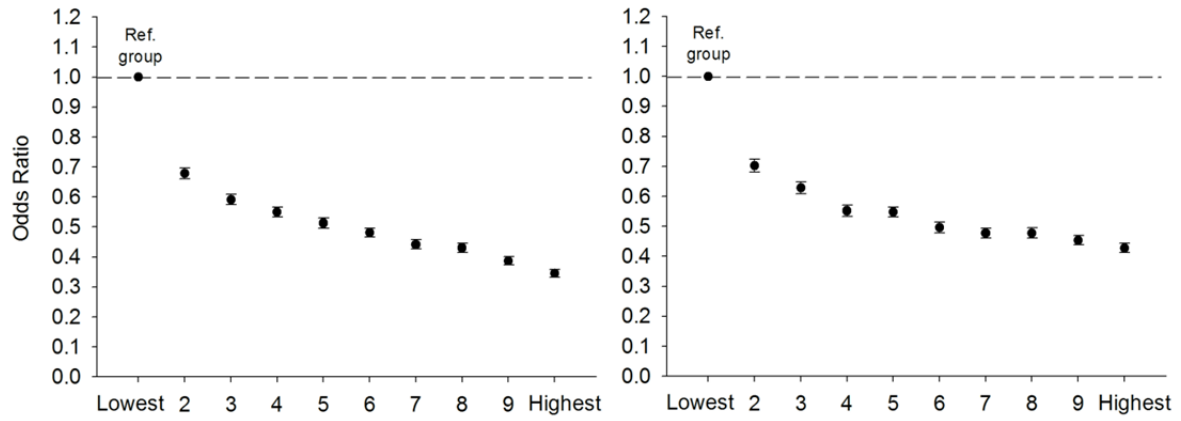

**Psychiatric diagnosis years later (longitudinal analysis)**

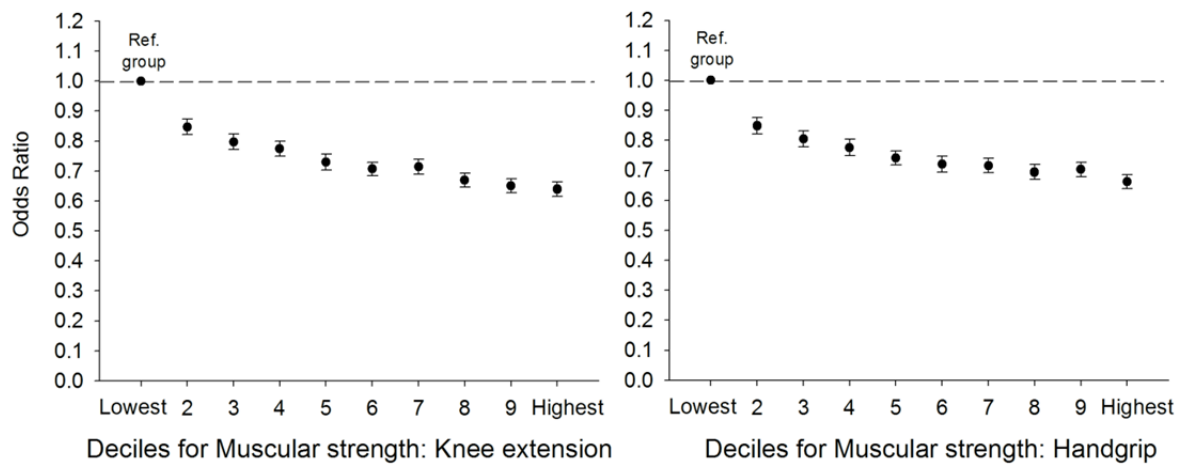

**Appendix Figure F.**
